# Supplementary material
Source: bioRxiv or medRxiv preprint supplement (https://www.biorxiv.org/highwire/filestream/120997/field_highwire_adjunct_files/1/399931-2.pdf)
Supplement: Supplementary file [file 399931-2.pdf]

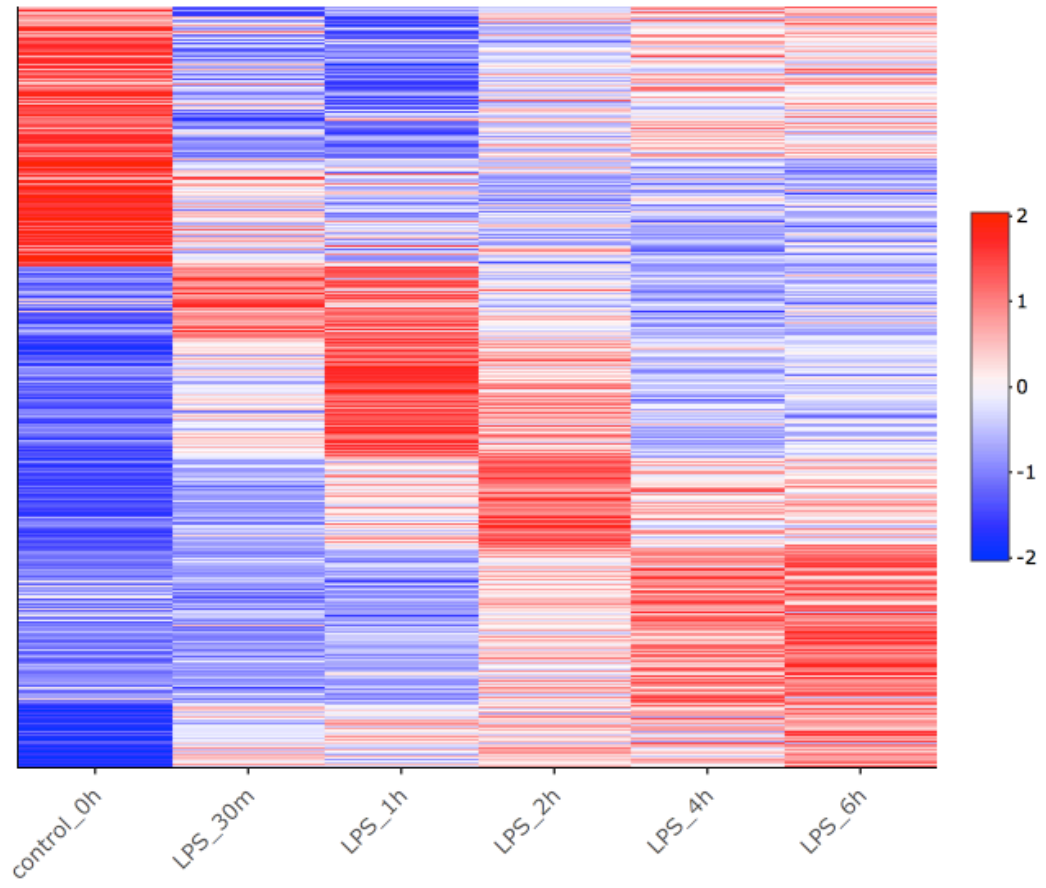

Figure S2. Heatmap of open chromatin regions affected by LPS stimulation.
